# Supplementary material for: Two Novel Endornaviruses Co-infecting a Phytophthora Pathogen of Asparagus officinalis Modulate the Developmental Stages and Fungicide Sensitivities of the Host Oomycete
Source: PubMed Central journal article supplement (PMC7902037; doi:10.3389/fmicb.2021.633502), 2021-02-03
Supplement: Data_Sheet_1.pdf [file Data_Sheet_1.pdf]

*Supplementary Material*

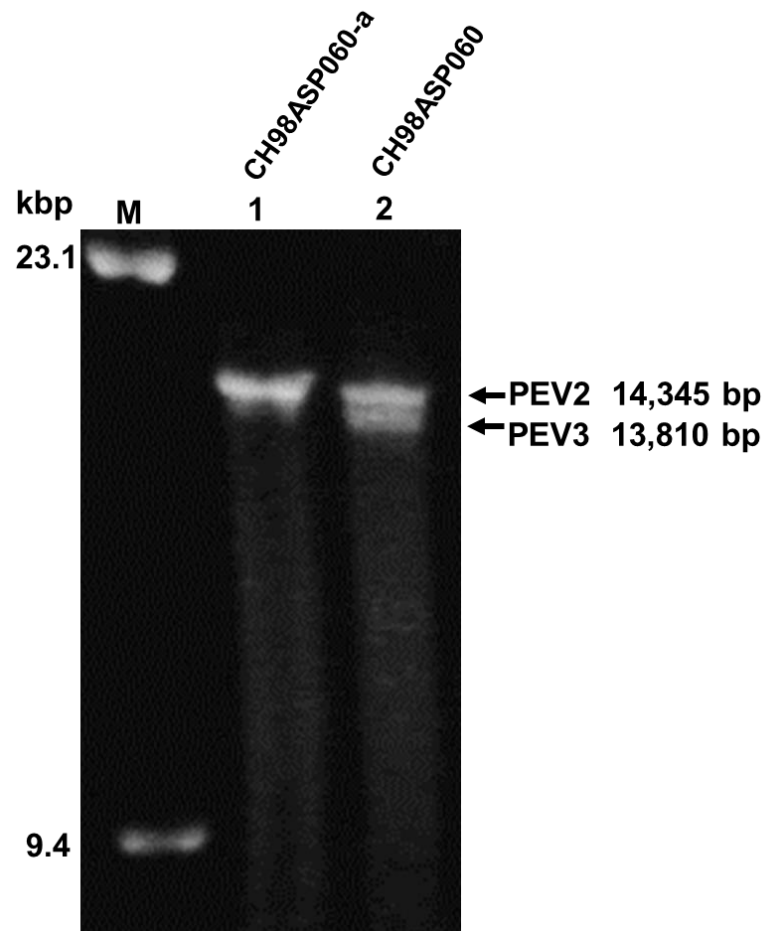

**Supplementary Figure 1. Agarose gel electrophoresis of the PEV2 and PEV3 dsRNAs. The electrophoresis conditions were: 0.6 % agarose, 20V, 50h, stained with 0.5 mg/ml ethidium bromide. Lane M, DNA size markers (250 ng of  $\lambda$  DNA digested with Hind III) ; lane 1, CH98ASP060-a/PEV2&PEV3#; lane 2, CH98ASP060/PEV2&PEV3.**

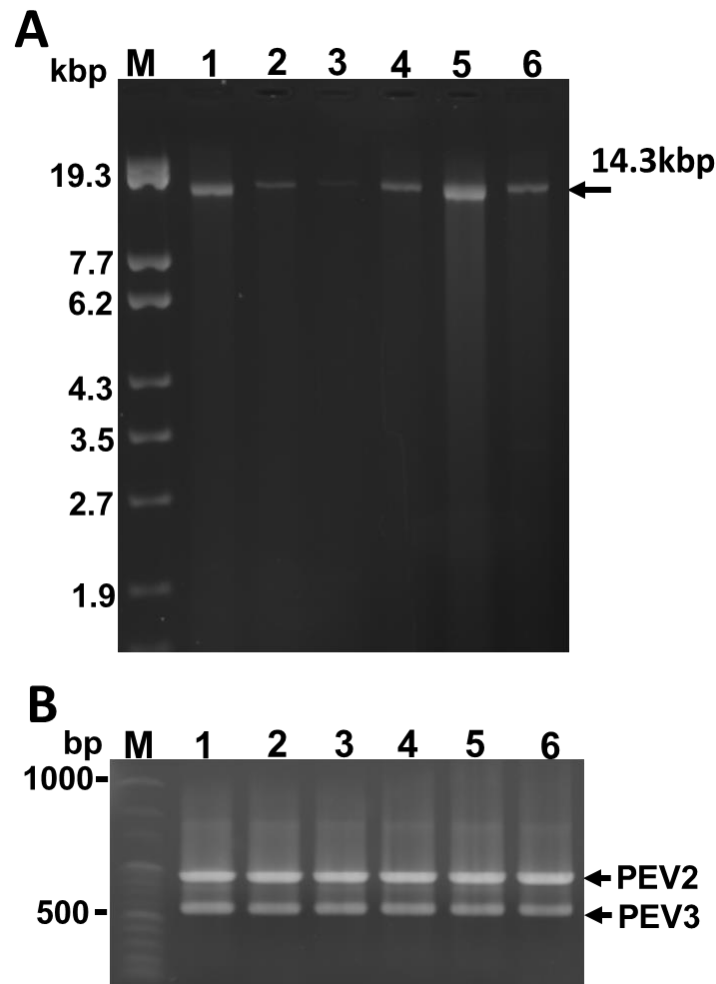

**Supplementary Figure 2. Detection of the dsRNA genomes of PEV2 and PEV3 in *Phytophthora* sp. isolates grown on PDA or in PD broth containing 100  $\mu\text{g ml}^{-1}$  metalaxyl. (A) Agarose gel electrophoresis of dsRNAs purified from the three PEV2 and PEV3 high-titer isolates. The intensities of the bands were semi-quantified by densitometry using a CS-Analyzerver.3.0 (ATTO). Lane 1, 51.2 ng; lane 2, 15.7 ng; lane 3, 5.3 ng; lane 4, 30.0 ng; lane 5, 48.6 ng; lane 6, 35.8 ng. (B) RT-PCR amplification using PEV2 and PEV3-specific primers (Table S2). Lane designations: 1–3, After subculturing 5 times on PDA medium without metalaxyl, the isolates were grown in PD broth under static culture conditions. 4–6, After subculturing 5 times on PDA medium containing 100  $\text{mg ml}^{-1}$  metalaxyl, the isolates were grown in PD broth under static culture conditions. M, DNA size markers (300 ng of  $\lambda$  DNA digested with EcoT14I); lanes 1 and 4, CH98ASP060-a/PEV2&PEV3#; lanes 2 and 5, CH98ASP060/PEV2&PEV3; lanes 3 and 6, CH98ASP059/PEV2&PEV3.**

**Supplementary Table S1.** Occurrence of dsRNAs in 68 *Phytophthora* isolates and 2 *Pythium* isolates.

| Species, host           | Isolate                   | Location  | dsRNA | Species, host          | Isolate                 | Location | dsRNA |
|-------------------------|---------------------------|-----------|-------|------------------------|-------------------------|----------|-------|
| <i>Phytophthora</i> sp. |                           |           |       | <i>P. cactorum</i>     |                         |          |       |
| Asparagus               | CH98ASP060                | Toyama    | +     | Loquat                 | CH98LOQ1<br>MAFF242859  | Chiba    | —     |
| Asparagus               | CH98ASP051                | Toyama    | +     | <i>P. citrophthora</i> |                         |          |       |
| Asparagus               | CH98ASP059                | Toyama    | +     | Kiwifruit              | CH90-15<br>MAFF245812   | Chiba    | —     |
| Asparagus               | CH98ASP066                | Toyama    | +     | Kiwifruit              | CH90-16                 | Chiba    | —     |
| Asparagus               | Ku-1                      | Hokkaido  | +     | Kiwifruit              | CH90-19<br>MAFF242874   | Chiba    | —     |
| Asparagus               | Ak-6-1                    | Akita     | +     | Citrus unshiu          | CH98U7B                 | Chiba    | —     |
| Asparagus               | Fk-3                      | Fukushima | +     | Citrus unshiu          | CH98U8B                 | Chiba    | —     |
| <i>P. nicotianae</i>    |                           |           |       | <i>P. cryptogea</i>    |                         |          |       |
| Carrot                  | CH08DC9                   | Okinawa   | —     | Carnation              | CH96CAR51               | Chiba    | —     |
| Roselle                 | CH08HS1                   | Okinawa   | —     | Carnation              | CH96CAR4                | Chiba    | —     |
| Roselle                 | CH08HS3                   | Okinawa   | —     | Carnation              | CH96CAR8                | Chiba    | —     |
| Roselle                 | CH08HS7                   | Okinawa   | —     | Gerbera                | CH95PHG4                | Chiba    | —     |
| Roselle                 | CH08HS9                   | Okinawa   | —     | Gerbera                | CH97PHG9                | Chiba    | —     |
| Roselle                 | CH08HS10                  | Okinawa   | —     | Eustoma                | CH95PHE26               | Chiba    | —     |
| Kidney bean             | CH1999PV14                | Chiba     | —     | Eustoma                | CH95PHE27               | Ibaraki  | —     |
| Lavender                | CH99LAV1-1                | Chiba     | —     | Eustoma                | CH95PHE10<br>MAFF245820 | Chiba    | —     |
| Lavender                | CH99LAV1-2                | Chiba     | —     | Eustoma                | CH95PHE16<br>MAFF242880 | Ibaraki  | —     |
| Strelitzia              | CH07STR23                 | Chiba     | —     | <i>P. palmivora</i>    |                         |          |       |
| Strelitzia              | CH07STR25                 | Chiba     | —     | Oncidium               | CH88-1<br>MAFF242892    | Chiba    | —     |
| Strelitzia              | CH07STR32                 | Chiba     | —     | Cymbidium              | CH05PAL051              | Chiba    | —     |
| Strelitzia              | CH07STR34                 | Chiba     | —     | Cymbidium              | CH06PAL061              | Chiba    | —     |
| Strelitzia              | CH07STR34-2               | Chiba     | —     | Citrus                 | CH99KP1                 | Chiba    | —     |
| Strelitzia              | CH07STR34-3               | Chiba     | —     | Strelitzia             | CH07STR12               | Chiba    | —     |
| Strelitzia              | CH07STR42                 | Chiba     | —     | Strelitzia             | CH07STR14               | Chiba    | —     |
| Strelitzia              | CH07STR43                 | Chiba     | —     | <i>P. citricola</i>    |                         |          |       |
| Strelitzia              | CH07STR42<br>(4-4)        | Chiba     | —     | Citrus unshiu          | CH98U121C               | Chiba    | —     |
| Strelitzia              | CH07STR42<br>(4-5)        | Chiba     | —     | Citrus unshiu          | CH98U122C               | Chiba    | —     |
| Strelitzia              | CH07STR72                 | Chiba     | —     | Citrus unshiu          | CH98U132C               | Chiba    | —     |
| Strelitzia              | CH07STR81                 | Chiba     | —     | <i>P. cinnamomi</i>    |                         |          |       |
| Strelitzia              | CH07STR101                | Chiba     | —     | Eustoma                | CH95PHE1                | Ibaraki  | —     |
| Citrus junos            | CH98Y1A-W-2<br>MAFF245844 | Chiba     | —     | Eustoma                | CH95PHE1-1              | Ibaraki  | —     |
| Citrus junos            | CH98Y1A-W-3<br>MAFF245844 | Chiba     | —     | Eustoma                | CH95PHE4                | Ibaraki  | —     |
| Citrus junos            | CH98Y2A                   | Chiba     | —     | Eustoma                | CH95PHE20               | Ibaraki  | —     |

|               |            |       |   |                     |           |       |   |
|---------------|------------|-------|---|---------------------|-----------|-------|---|
| Citrus junos  | CH98Y2A-1  | Chiba | — | <i>Pythium spp.</i> |           |       |   |
| Bougainvillea | CH89-50    | Chiba | — | Nemophila           | CH98PYNE1 | Chiba | — |
| Dianthus      | CH87KY22   | Chiba | — | Ranunculus          | CH08RAPY9 | Chiba | — |
| Dianthus      | CH99KY11   | Chiba | — |                     |           |       |   |
| Easter lily   | CH91PKL3   | Chiba | — |                     |           |       |   |
| Parsley       | CH85PHP105 | Chiba | — |                     |           |       |   |
| Parsley       | CH85PHP61  | Chiba | — |                     |           |       |   |
| Carnation     | CH01DH1    | Chiba | — |                     |           |       |   |

+, infection; -, negative.

**Supplementary Table S2.** List of primers used in the study.

| primer name  | sequence (5'-3')                                       | position            |
|--------------|--------------------------------------------------------|---------------------|
| PEV2-1F      | AACCACACTTGCAGCCTATGAAC                                | PEV2 ( 2369-2392 )  |
| PEV2-1R      | GTCGCCAGACTAGTTTCAATTGC                                | PEV2 ( 3305-3328 )  |
| PEV2-5' RACE | GGTCAAGACAGGCGGTAATCTCG                                | PEV2 ( 144-166 )    |
| PEV2-3' RACE | GTGATGTTACCAAGCATGGGACGTTCTG                           | PEV2 (13904-13932 ) |
| PEV3-1F      | GTTCCAATACCGTCCAACGTGTC                                | PEV3 ( 961-983 )    |
| PEV3-1R      | ACTTCACCAGGGACCTTCATGG                                 | PEV3 ( 1559-1580 )  |
| PEV3-5' RACE | CTTGTACCTATTTGTAAGTCTTTAGGTGATGG                       | PEV3 ( 214-245 )    |
| PEV3-3' RACE | CACGGCACTTTCTGTAGTATGGTGGCTTAC                         | PEV3 (13396-13425 ) |
| oligo-dT     | CGA TGG TAC CTG CAG GCG CGC CTT TTT<br>TTT TTT TTT TTT | for 3' RACE         |
| oligo-dT AP  | CGA TGG TAC CTG CAG GCG CGC C                          | for 3' RACE         |

**Supplementary Table S3.** Amino acid identities between the RdRp regions of PEV2 and PEV3 and those of other endornaviruses.

| virus name                                 | RdRp |      | Sequence ID    |
|--------------------------------------------|------|------|----------------|
|                                            | PEV2 | PEV3 |                |
| <i>Lagenaria siceraria endornavirus</i>    | -    | 43%  | YP_009010973.1 |
| <i>Cucumis melo endornavirus</i>           | 43%  | 45%  | YP_009222598.1 |
| <i>Yerba mate endornavirus</i>             | 45%  | 46%  | YP_009046830.1 |
| <i>Vicia faba endornavirus</i>             | 49%  | 44%  | YP_438201.1    |
| <i>Phytophthora endornavirus 1</i>         | 53%  | 72%  | YP_241110.1    |
| <i>Hordeum vulgare endornavirus</i>        | 43%  | 44%  | YP_009212849.1 |
| <i>Winged bean endornavirus 1</i>          | 41%  | 44%  | YP_009305414.1 |
| <i>Phaseolus vulgaris endornavirus 2</i>   | 42%  | 44%  | BAM68540.1     |
| <i>Hot pepper endornavirus</i>             | 43%  | 43%  | YP_009165596.1 |
| <i>Rhizoctonia cerealis endornavirus 1</i> | 48%  | 46%  | YP_008719905.1 |
| <i>Rhizoctonia solani endornavirus 1</i>   | 43%  | -    | YP_009552276.1 |

|                                           |     |     |                |
|-------------------------------------------|-----|-----|----------------|
| Arthrocladiella mougeotii endornavirus    | -   | 44% | AZO92732.1     |
| Helianthus annuus endornavirus            | 47% | 43% | YP_009553502.1 |
| Brown algae endornavirus 1                | 47% | 49% | BBZ90073.1     |
| Brown algae endornavirus 2                | 49% | -   | BBZ90074.1     |
| Bremia lactucae associated endornavirus 1 | 52% | 75% | QIP68005.1     |

**Supplementary Table S4.** Amino acid identities between the viral helicase (Hel-1) motifs of PEV2 and PEV3 and those of other endornaviruses.

| virus name                                       | Hel-1 |      | Sequence ID    |
|--------------------------------------------------|-------|------|----------------|
|                                                  | PEV2  | PEV3 |                |
| <i>Lagenaria siceraria endornavirus</i>          | 31%   | 30%  | YP_009010973.1 |
| <i>Cucumis melo endornavirus</i>                 | 33%   | -    | YP_009222598.1 |
| <i>Yerba mate endornavirus</i>                   | 31%   | -    | YP_009046830.1 |
| <i>Persea americana endornavirus 1</i>           | 33%   | -    | YP_005086952.1 |
| <i>Oryza sativa endornavirus</i>                 | 32%   | 30%  | YP_438200.1    |
| <i>Oryza rufipogon endornavirus</i>              | -     | 31%  | YP_438202.1    |
| <i>Vicia faba endornavirus</i>                   | 33%   | 33%  | YP_438201.1    |
| <i>Phytophthora endornavirus 1</i>               | 39%   | 58%  | YP_241110.1    |
| <i>Hordeum vulgare endornavirus</i>              | 27%   | -    | YP_009212849.1 |
| <i>Winged bean endornavirus 1</i>                | 28%   | 28%  | YP_009305414.1 |
| <i>Phaseolus vulgaris endornavirus 2</i>         | -     | 34%  | BAM68540.1     |
| <i>Hot pepper endornavirus</i>                   | -     | 34%  | YP_009165596.1 |
| <i>Rhizoctonia cerealis endornavirus 1</i>       | 30%   | 30%  | YP_008719905.1 |
| <i>Agaricus bisporus endornavirus 1</i>          | -     | 32%  | AQM32768.1     |
| <i>Grapevine endophyte endornavirus</i>          | 25%   | 29%  | YP_007003829.1 |
| <i>Erysiphe cichoracearum endornavirus</i>       | 27%   | 28%  | YP_009225663.1 |
| <i>Rhizoctonia solani endornavirus 1</i>         | 25%   | 29%  | YP_009552276.1 |
| <i>Arthrocladiella mougeotii endornavirus</i>    | -     | 30%  | AZO92732.1     |
| <i>Helianthus annuus endornavirus</i>            | -     | 31%  | YP_009553502.1 |
| Brown algae endornavirus 1                       | 29%   | 31%  | BBZ90073.1     |
| Brown algae endornavirus 2                       | 32%   | 33%  | BBZ90074.1     |
| <i>Geranium carolinianum endornavirus 1</i>      | -     | 27%  | QBB21108.1     |
| <i>Bremia lactucae associated endornavirus 1</i> | 39%   | 63%  | QIP68005.1     |

**Supplementary Table S5.** GenBank accession numbers of the virus-encoded amino acid sequences used in the phylogenetic analysis.

| Virus name                              | Accession      | Genus                    | Family                |
|-----------------------------------------|----------------|--------------------------|-----------------------|
| <i>Lagenaria siceraria endornavirus</i> | YP_009010973.1 | <i>Alphaendornavirus</i> | <i>Endornaviridae</i> |
| <i>Cucumis melo endornavirus</i>        | YP_009222598.1 | <i>Alphaendornavirus</i> | <i>Endornaviridae</i> |

|                                                  |                |                          |                        |
|--------------------------------------------------|----------------|--------------------------|------------------------|
| <i>Phaseolus vulgaris endornavirus 1</i>         | YP_009011062.1 | <i>Alphaendornavirus</i> | <i>Endornaviridae</i>  |
| <i>Basella alba endornavirus 1</i>               | AB844264.1     | <i>Alphaendornavirus</i> | <i>Endornaviridae</i>  |
| <i>Yerba mate endornavirus</i>                   | YP_009046830.1 | <i>Alphaendornavirus</i> | <i>Endornaviridae</i>  |
| <i>Persea americana endornavirus 1</i>           | YP_005086952.1 | <i>Alphaendornavirus</i> | <i>Endornaviridae</i>  |
| <i>Oryza sativa endornavirus</i>                 | YP_438200.1    | <i>Alphaendornavirus</i> | <i>Endornaviridae</i>  |
| <i>Oryza rufipogon endornavirus</i>              | YP_438202.1    | <i>Alphaendornavirus</i> | <i>Endornaviridae</i>  |
| <i>Vicia faba endornavirus</i>                   | YP_438201.1    | <i>Alphaendornavirus</i> | <i>Endornaviridae</i>  |
| <i>Phytophthora endornavirus 1</i>               | YP_241110.1    | <i>Alphaendornavirus</i> | <i>Endornaviridae</i>  |
| <i>Hordeum vulgare endornavirus</i>              | YP_009212849.1 | <i>Alphaendornavirus</i> | <i>Endornaviridae</i>  |
| <i>Winged bean endornavirus 1</i>                | YP_009305414.1 | <i>Alphaendornavirus</i> | <i>Endornaviridae</i>  |
| <i>Phaseolus vulgaris endornavirus 2</i>         | BAM68540.1     | <i>Alphaendornavirus</i> | <i>Endornaviridae</i>  |
| <i>Bell pepper endornavirus</i>                  | YP_004765011.1 | <i>Alphaendornavirus</i> | <i>Endornaviridae</i>  |
| <i>Hot pepper endornavirus</i>                   | YP_009165596.1 | <i>Alphaendornavirus</i> | <i>Endornaviridae</i>  |
| <i>Helicobasidium mompa endornavirus 1</i>       | YP_003280846.1 | <i>Alphaendornavirus</i> | <i>Endornaviridae</i>  |
| <i>Rhizoctonia cerealis endornavirus 1</i>       | YP_008719905.1 | <i>Alphaendornavirus</i> | <i>Endornaviridae</i>  |
| <i>Agaricus bisporus endornavirus 1</i>          | AQM32768.1     | <i>Alphaendornavirus</i> | <i>Endornaviridae</i>  |
| <i>Grapevine endophyte endornavirus</i>          | YP_007003829.1 | <i>Alphaendornavirus</i> | <i>Endornaviridae</i>  |
| <i>Erysiphe cichoracearum endornavirus</i>       | YP_009225663.1 | NA                       | NA                     |
| Cluster bean endornavirus 1                      | AYA60157.1     | NA                       | NA                     |
| <i>Phaseolus vulgaris endornavirus 3</i>         | AXB99512.1     | NA                       | NA                     |
| <i>Rhizoctonia solani endornavirus 1</i>         | YP_009552276.1 | NA                       | NA                     |
| <i>Arthrocladiella mougeotii endornavirus</i>    | AZO92732.1     | NA                       | NA                     |
| <i>Helianthus annuus endornavirus</i>            | YP_009553502.1 | NA                       | NA                     |
| Brown algae endornavirus 1                       | BBZ90073.1     | NA                       | NA                     |
| Brown algae endornavirus 2                       | BBZ90074.1     | NA                       | NA                     |
| <i>Geranium carolinianum endornavirus 1</i>      | QBB21108.1     | NA                       | NA                     |
| <i>Phytophthora endornavirus 2</i>               | LC586217       | NA                       | NA                     |
| <i>Phytophthora endornavirus 3</i>               | LC586218       | NA                       | NA                     |
| <i>Bremia lactucae associated endornavirus 1</i> | QIP68005.1     | NA                       | NA                     |
| <i>Alternaria brassicicola endornavirus 1</i>    | YP_009115493.1 | <i>Betaendornavirus</i>  | <i>Endornaviridae</i>  |
| <i>Tuber aestivum endornavirus</i>               | YP_004123950.1 | <i>Betaendornavirus</i>  | <i>Endornaviridae</i>  |
| <i>Gremmeniella abietina endornavirus 1</i>      | YP_529670.1    | <i>Betaendornavirus</i>  | <i>Endornaviridae</i>  |
| <i>Sclerotinia sclerotiorum endornavirus 1</i>   | YP_009022070.1 | <i>Betaendornavirus</i>  | <i>Endornaviridae</i>  |
| <i>Botrytis cinerea endornavirus 1</i>           | YP_009315910.1 | <i>Betaendornavirus</i>  | <i>Endornaviridae</i>  |
| <i>Rosellinia necatrix endornavirus 1</i>        | YP_009276355.1 | NA                       | NA                     |
| <i>Sclerotinia minor endornavirus 1</i>          | YP_009552723.1 | NA                       | NA                     |
| <i>Grapevine leafroll-associated virus 1</i>     | YP_004940642   | <i>Ampelovirus</i>       | <i>Closteroviridae</i> |

NA= Not available.

**Supplementary Table S6.** Sensitivities of the *Phytophthora* sp. isolates to four fungicides, based on the minimal inhibitory concentrations (MICs).

| Isolate      | endornaviruses | MIC ( $\mu\text{g ml}^{-1}$ ) |                        |                   |                |
|--------------|----------------|-------------------------------|------------------------|-------------------|----------------|
|              |                | benthiavdicarb-<br>isopropyl  | famoxadone<br>+ 1mM PG | metalaxyl         | chlorothalonil |
| CH98APS060   | PEV2&PEV3      | 0.03                          | 1.5                    | >100 <sup>a</sup> | >400           |
| CH98APS060-a | PEV2&PEV3#     | 0.03                          | 1.5                    | >100              | >400           |
| CH98ASP059   | PEV2&PEV3      | 0.03                          | 1.5                    | >100              | >400           |
| CH98ASP059-L | PEV2#&PEV3#    | 0.3                           | >150                   | 10.0              | >400           |

<sup>a</sup>The MIC value is shown with the recommended concentration as the upper limit.

**Supplementary Table S7.** Sensitivities of the *Phytophthora* sp. isolates to famoxadone on PDA medium without the addition of n-propyl gallate.

| Isolate      | endornaviruses | Mycelial growth inhibition (%) at    |       |      |        |      |                  |                  |
|--------------|----------------|--------------------------------------|-------|------|--------|------|------------------|------------------|
|              |                | famoxadone ( $\mu\text{g ml}^{-1}$ ) |       |      |        |      |                  |                  |
|              |                | 0.0015                               | 0.015 | 0.15 | 1.5    | 15   | 150 <sup>a</sup> | 300 <sup>b</sup> |
| CH98APS060   | PEV2&PEV3      | 0.0                                  | 7.0   | 0.0  | 22.0** | 17.0 | 84.0             | 79.6             |
| CH98APS060-a | PEV2&PEV3#     | 0.0                                  | 23.8  | 73.5 | 79.6** | 78.2 | 89.0             | 89.9             |
| CH98ASP059   | PEV2&PEV3      | 0.0                                  | 0.0   | 0.0  | 15.0** | 15.0 | 72.6             | 66.6             |
| CH98ASP059-L | PEV2#&PEV3#    | 0.0                                  | 0.0   | 0.0  | 0.0**  | 0.0  | 0.0              | 0.0              |

<sup>a</sup>The recommended concentration for commercial use.

<sup>b</sup>Five times the recommended concentration for commercial use.

\*\* indicate  $p$  value < 0.01, respectively (the Tukey-Kramer range test).

**Supplementary Table S8.** Sensitivities of *Phytophthora* sp. isolates to famoxadone (FA) and/or n-propyl gallate (PG) on potato dextrose agar medium.

| Isolate      | endornaviruses | Mycelial growth inhibition (%) at |                                       |        |
|--------------|----------------|-----------------------------------|---------------------------------------|--------|
|              |                | FA 1.5 $\mu\text{g ml}^{-1}$      | FA 1.5 $\mu\text{g ml}^{-1}$ + 1mM PG | 1mM PG |
| CH98APS060   | PEV2&PEV3      | 22.0                              | 100.0                                 | 59.5   |
| CH98APS060-a | PEV2&PEV3#     | 79.6                              | 100.0                                 | 77.1   |
| CH98ASP059   | PEV2&PEV3      | 15.0                              | 100.0                                 | 57.6   |
| CH98ASP059-L | PEV2#&PEV3#    | 0.0                               | 14.1                                  | 25.0   |
